# Supplementary material for: Toxic Effects of Heavy Metals and Organic Polycyclic Aromatic Hydrocarbons in Sediment Porewater on the Amphipod Hyalella azteca and Zebrafish Brachydanio rerio Embryos from Different Rivers in Taiwan
Source: MDPI journal article supplement (doi:10.3390/app11178021), 2021-08-30
Supplement: s1 [file s1]

# **Supplementary material**

**Table S1. Mobile phase gradient for the UPLC**

| Time (min) | Flow (ml/min) | H <sub>2</sub> O (%) | ACN (%) |
|------------|---------------|----------------------|---------|
| 0          | 0.4           | 50                   | 50      |
| 6.75       | 0.4           | 50                   | 50      |
| 8.25       | 0.4           | 33                   | 67      |
| 11.25      | 0.3           | 33                   | 67      |
| 14.25      | 0.4           | 23                   | 77      |
| 18.00      | 0.4           | 50                   | 50      |

**Table S2. Wavelength programs for fluorescence detection**

| Time | Ex (nm) | Em (nm) |
|------|---------|---------|
| 0.00 | 270     | 326     |
| 7.80 | 243     | 397     |
| 9.90 | 320     | 430     |
| 11.5 | 294     | 410     |
| 13.0 | 320     | 430     |
| 15.5 | 275     | 390     |
| 16.5 | 303     | 495     |
| 20.0 | 303     | 495     |

**Table S3. Retention times and method detection limits of the 16 PAHs.**

|    | Compound               | Retention Time | MDL<br>(µg/L) |
|----|------------------------|----------------|---------------|
| 1  | Naphthalene            | 4.365          | 0.08          |
| 2  | Acenaphthylene         | 5.374          | 0.2           |
| 3  | Acenaphthene           | 6.980          | 0.09          |
| 4  | Fluorene               | 7.317          | 0.04          |
| 5  | Phenanthrene           | 8.911          | 0.2           |
| 6  | Anthracene             | 9.394          | 0.05          |
| 7  | Fluoranthene           | 10.414         | 0.08          |
| 8  | Pyrene                 | 10.826         | 0.07          |
| 9  | Chrysene               | 12.713         | 0.04          |
| 10 | Benzo(a) anthracene    | 12.857         | 0.15          |
| 11 | Benzo(b) fluoranthene  | 14.647         | 0.08          |
| 12 | Benzo(k) fluoranthene  | 14.813         | 0.001         |
| 13 | Benzo(a) pyrene        | 15.168         | 0.015         |
| 14 | Dibenz(a,h) perylene   | 16.216         | 0.18          |
| 15 | Indeno(1,2,3-cd)pyrene | 17.070         | 0.02          |
| 16 | Benzo(g,h,i) perylene  | 17.439         | 0.08          |

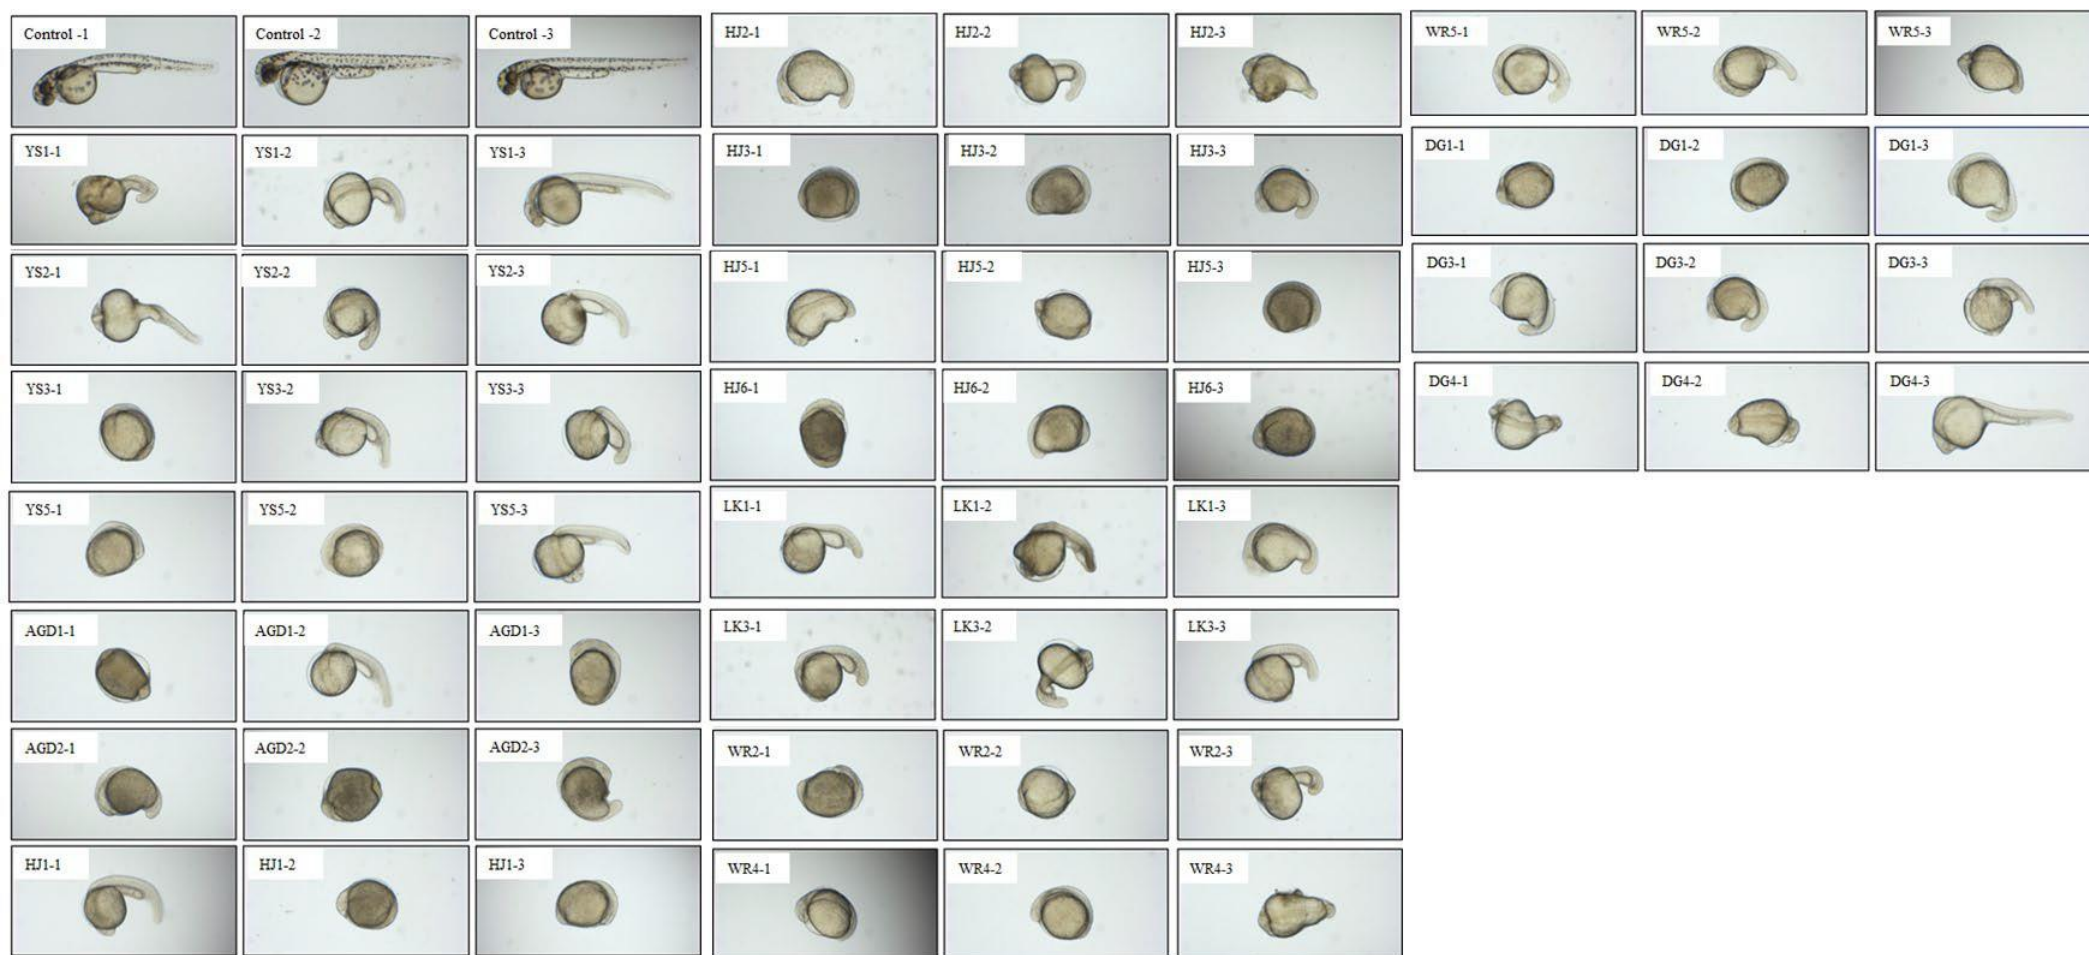

Figure S1. Effects of deformities caused by sediment porewater from different locations in Taiwan on zebrafish after a 2 days treatment. The main deformity forms include spinal cord curvature, cardiac edema, developmental stagnation, tail necrosis.

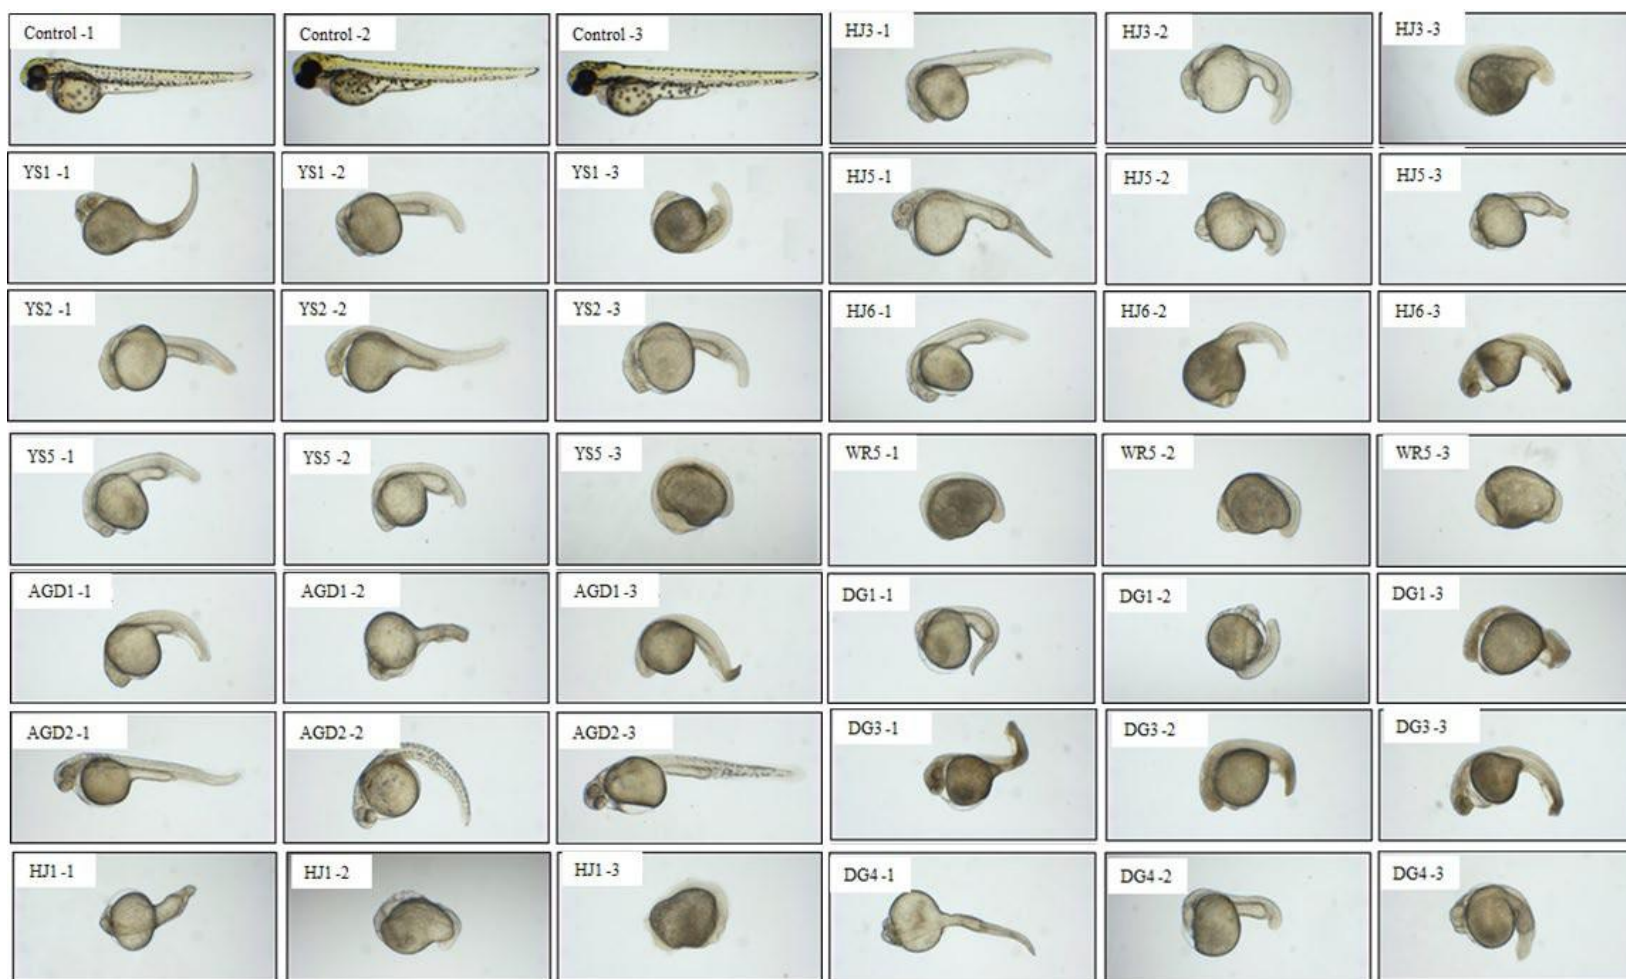

Figure S2. Effects of deformities caused by sediment porewater in different locations in Taiwan on zebrafish after 3 days treatment. The main deformities include spinal cord curvature, cardiac edema, developmental slowness and stagnation, or tail necrosis.
